# Supplementary material for: SNP-SNP Interaction between TLR4 and MyD88 in Susceptibility to Coronary Artery Disease in the Chinese Han Population
Source: PubMed Central journal article supplement (PMC4808941; doi:10.3390/ijerph13030278), 2016-03-04
Supplement: ijerph-13-00278-s001.pdf [file ijerph-13-00278-s001.pdf]

# Supplementary Materials: SNP-SNP Interaction between TLR4 and MyD88 in Susceptibility to Coronary Artery Disease in the Chinese Han Population

Dandan Sun, Liping Sun, Qian Xu, Yuehua Gong, Honghu Wang, Jun Yang and Yuan Yuan

**Table S1.** Primer sequences and reaction conditions.

| SNPs       | Primer Sequence                                                         | Annealing Temperature | Restriction Endonuclease | Digestive Temperature | Product Size     |
|------------|-------------------------------------------------------------------------|-----------------------|--------------------------|-----------------------|------------------|
| rs10116253 | F: GGGTGAAAAGC<br>CAGGTAGAGGAGGT<br>R: TGGAAAGTAGCAA<br>GTGCAATGTAAGT   | 63 °C                 | BsmAI                    | 37 °C                 | TT: 470 + 131 bp |
|            | TC: 601 + 470 + 131 bp                                                  |                       |                          |                       |                  |
|            | CC: 233 bp                                                              |                       |                          |                       |                  |
| rs10983755 | F: TGCCAGAACATCAA<br>GAACACAGAAAAG<br>R: TGGAAAGTAGCA<br>AGTGCAATGTAAGT | 60 °C                 | Tail                     | 65 °C                 | GG: 342 + 121 bp |
|            | GA: 463 + 342 + 121 bp                                                  |                       |                          |                       |                  |
|            | AA: 463 bp                                                              |                       |                          |                       |                  |
| rs11536889 | F: GCAGGAAGGA<br>AGTGGGATGAC<br>R: TGTTTCTGAGG<br>AGGCTGGATG            | 63 °C                 | TaaI                     | 65 °C                 | GG: 391 bp       |
|            | GC: 391 + 292 + 99 bp                                                   |                       |                          |                       |                  |
|            | CC: 292 + 99 bp                                                         |                       |                          |                       |                  |
| rs7744     | F: AGGGAGCCTAA<br>CCATGTCCTGA<br>R: AGGGTCTGT<br>CCTGGGGCACA            | 61 °C                 | FspBI                    | 37 °C                 | AA: 291 bp       |
|            | AG: 291 + 172 + 119 bp                                                  |                       |                          |                       |                  |
|            | GG: 172 + 119 bp                                                        |                       |                          |                       |                  |

**Table S2.** The genotype frequencies and HWE in this study.

| Genotype                       | Cases      | Controls   | <i>p</i> Value of HWE | Chr (Chr Position) |
|--------------------------------|------------|------------|-----------------------|--------------------|
| <i>TLR4</i> rs10116253 (T > C) |            |            | 0.333                 | 9 (117702042)      |
| TT (%)                         | 154 (36.3) | 122 (28.8) |                       |                    |
| TC (%)                         | 199 (46.9) | 220 (51.9) |                       |                    |
| CC (%)                         | 71 (16.7)  | 82 (19.3)  |                       |                    |
| T allele (%)                   | 507 (59.8) | 464 (54.7) |                       |                    |
| C allele (%)                   | 341 (40.2) | 384 (45.3) |                       |                    |
| <i>TLR4</i> rs10983755 (G > A) |            |            | 0.186                 | 9 (117702392)      |
| GG (%)                         | 218 (51.4) | 189 (44.6) |                       |                    |
| GA (%)                         | 170 (40.1) | 197 (46.5) |                       |                    |
| AA (%)                         | 36 (8.5)   | 38 (9.0)   |                       |                    |
| G allele (%)                   | 606 (71.5) | 575 (67.8) |                       |                    |
| A allele (%)                   | 242 (28.5) | 273 (32.2) |                       |                    |
| <i>TLR4</i> rs11536889 (G > C) |            |            | 0.383                 | 9 (117715853)      |
| GG (%)                         | 255 (60.1) | 270 (63.7) |                       |                    |
| GC (%)                         | 144 (34.0) | 133 (31.4) |                       |                    |
| CC (%)                         | 25 (5.9)   | 21 (5.0)   |                       |                    |
| G allele (%)                   | 654 (77.1) | 673 (79.4) |                       |                    |
| C allele (%)                   | 194 (22.9) | 175 (20.6) |                       |                    |

| <i>MyD88</i> rs7744 (A > G) |            | 0.177      | 3 (38142530) |
|-----------------------------|------------|------------|--------------|
| AA (%)                      | 157 (37.0) | 174 (41.0) |              |
| AG (%)                      | 213 (50.2) | 185 (43.6) |              |
| GG (%)                      | 54 (12.7)  | 65 (15.3)  |              |
| A allele (%)                | 527 (62.1) | 533 (62.9) |              |
| G allele (%)                | 321 (37.9) | 315 (37.1) |              |

HWE: Hardy-Weiberg equilibrium; *TLR4*: toll-like receptor 4; *MyD88*: myeloid differentiation factor 88; Chr: chromosome.

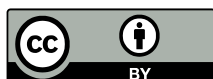

© 2016 by the authors; licensee MDPI, Basel, Switzerland. This article is an open access article distributed under the terms and conditions of the Creative Commons by Attribution (CC-BY) license (<http://creativecommons.org/licenses/by/4.0/>).
